# Supplementary material for: Long-Term Exposure to Ozone Increases Neurological Disability after Stroke: Findings from a Nationwide Longitudinal Study in China
Source: MDPI journal article supplement (doi:10.3390/biology11081216), 2022-08-13
Supplement: s1 [file s1]

# Supplemental Materials

## Long-term exposure to ozone increases neurological disability after stroke: findings from a nationwide longitudinal study in China

Jiajianghui Li <sup>1,†</sup>, Hong Lu <sup>1,†</sup>, Man Cao <sup>2</sup>, Mingkun Tong <sup>1</sup>, Ruohan Wang <sup>1</sup>, Xinyue Yang <sup>3</sup>, Hengyi Liu <sup>1</sup>, Qingyang Xiao <sup>4</sup>, Baohua Chao <sup>5</sup>, Yuanli Liu <sup>2</sup>, Tao Xue <sup>1,\*</sup> and Tianjia Guan <sup>2,\*</sup>

1 Institute of Reproductive and Child Health/National Health Commission Key Laboratory of Reproductive Health and Department of Epidemiology and Biostatistics, School of Public Health, Peking University, Beijing, 100191 China; lijiajianghuizi@163.com (J.L.); luhongsph@hsc.pku.edu.cn (H.L.); tongmk2021@bjmu.edu.cn (M.T.); wangruohan1202@163.com (R.W.); 1610306242@bjmu.edu.cn (H.L.)

2 School of Health Policy and Management, Chinese Academy of Medical Sciences & Peking Union Medical College, Beijing, 100730 China; caomanpumc@163.com (M.C.); yliu\_pumc@163.com (Y.L.)

3 College of Environmental Sciences and Engineering, Peking University, Beijing, 100871 China; 2101213369@stu.pku.edu.cn

4 State Key Joint Laboratory of Environmental Simulation and Pollution Control, School of Environment, Tsinghua University, Beijing 100084, China; qingyang\_xiao18@163.com

5 The General Office of Stroke Prevention Project Committee, National Health Commission of the People's Republic of China, Beijing, 100053 China; chaobh@163.com

\* Correspondence: xuetaogk\_9032@126.com (T.X.); gtj@sph.pumc.edu.cn (T.G.)

† These authors contributed equally to this work.

Supplemental Table S1 **(a)** Distribution of different quantiles of O<sub>3</sub> peak season concentration for lag 1,2,3 year (µg/m<sup>3</sup>) **(b)** Distribution of different quantiles of O<sub>3</sub> annual mean concentration for lag 1,2,3 year (µg/m<sup>3</sup>)

**(a)**

|                    | 10%   | 25%   | 50%    | 75%    | 90%    | min   | max    | mean   | n     | visit |
|--------------------|-------|-------|--------|--------|--------|-------|--------|--------|-------|-------|
| lag1O <sub>3</sub> | 86.70 | 99.07 | 112.57 | 127.68 | 140.63 | 31.41 | 158.71 | 113.18 | 28056 | 65778 |
| lag2O <sub>3</sub> | 85.77 | 97.19 | 110.19 | 124.80 | 136.78 | 33.23 | 154.26 | 110.57 | 26084 | 58245 |
| lag3O <sub>3</sub> | 84.35 | 95.30 | 108.36 | 121.21 | 128.65 | 38.81 | 154.57 | 107.55 | 19229 | 39751 |

**(b)**

|                    | 10%   | 25%   | 50%   | 75%   | 90%    | min   | max    | mean  | n     | visit |
|--------------------|-------|-------|-------|-------|--------|-------|--------|-------|-------|-------|
| lag1O <sub>3</sub> | 70.40 | 78.35 | 87.46 | 95.22 | 104.23 | 26.72 | 115.63 | 86.49 | 28056 | 65778 |
| lag2O <sub>3</sub> | 68.17 | 77.21 | 84.58 | 92.63 | 100.60 | 26.58 | 112.40 | 84.32 | 26084 | 58245 |
| lag3O <sub>3</sub> | 68.05 | 75.88 | 82.60 | 90.63 | 95.04  | 31.84 | 109.75 | 82.05 | 19229 | 39751 |

Supplemental Table S2 Descriptive characteristics of study participants at baseline by annual averaged O<sub>3</sub> concentration quartile

|                   | Overall      | O <sub>3</sub> First quartile<br>(≤75.03µg/m <sup>3</sup> ) | O <sub>3</sub> Second quartile<br>(75.03-82.75µg/m <sup>3</sup> ) | O <sub>3</sub> Third quartile<br>(82.75-90.49µg/m <sup>3</sup> ) | O <sub>3</sub> Fourth quartile<br>(>90.49µg/m <sup>3</sup> ) | p-Value |
|-------------------|--------------|-------------------------------------------------------------|-------------------------------------------------------------------|------------------------------------------------------------------|--------------------------------------------------------------|---------|
| Age Group         |              |                                                             |                                                                   |                                                                  |                                                              | <0.01   |
| ≤45               | 585(2.09)    | 201(2.87)                                                   | 137(1.95)                                                         | 136(1.94)                                                        | 111(0.16)                                                    | —       |
| 45-55             | 4288(15.28)  | 1154(16.45)                                                 | 1043(14.86)                                                       | 1060(15.12)                                                      | 1031(1.47)                                                   | —       |
| 55-65             | 9857(35.13)  | 2408(34.33)                                                 | 2539(36.18)                                                       | 2414(34.43)                                                      | 2496(3.56)                                                   | —       |
| 65-75             | 9681(34.51)  | 2349(33.49)                                                 | 2338(33.31)                                                       | 2489(35.50)                                                      | 2505(3.57)                                                   | —       |
| 75-85             | 3388(12.08)  | 831(11.85)                                                  | 886(12.62)                                                        | 858(12.24)                                                       | 813(1.16)                                                    | —       |
| >85               | 257(0.92)    | 72(1.03)                                                    | 75(1.07)                                                          | 54(0.77)                                                         | 56(0.08)                                                     | —       |
| Sex               |              |                                                             |                                                                   |                                                                  |                                                              | <0.01   |
| Female            | 13094(46.67) | 3337(47.57)                                                 | 3419(48.72)                                                       | 3138(44.76)                                                      | 3200(45.64)                                                  | —       |
| Male              | 14842(52.90) | 3670(52.32)                                                 | 3534(50.36)                                                       | 3826(54.57)                                                      | 3812(54.36)                                                  | —       |
| Missing           | 120(0.43)    | 8(0.11)                                                     | 65(0.93)                                                          | 47(0.67)                                                         | 0(0.00)                                                      | —       |
| AF                |              |                                                             |                                                                   |                                                                  |                                                              | <0.01   |
| No                | 26649(94.99) | 6688(95.34)                                                 | 6633(94.51)                                                       | 6542(93.31)                                                      | 6786(96.78)                                                  | —       |
| Yes               | 1401(4.99)   | 327(4.66)                                                   | 385(5.49)                                                         | 463(6.6)                                                         | 226(3.22)                                                    | —       |
| Missing           | 6(0.02)      | 0(0.00)                                                     | 0(0.00)                                                           | 6(0.09)                                                          | 0(0.00)                                                      | —       |
| Dyslipidemia      |              |                                                             |                                                                   |                                                                  |                                                              | <0.01   |
| No                | 15179(54.1)  | 3381(48.2)                                                  | 4043(57.61)                                                       | 3868(55.17)                                                      | 3887(55.43)                                                  | —       |
| Yes               | 9715(34.63)  | 2003(28.55)                                                 | 2453(34.95)                                                       | 2459(35.07)                                                      | 2800(39.93)                                                  | —       |
| Missing           | 3162(11.27)  | 1631(23.25)                                                 | 522(7.44)                                                         | 684(9.76)                                                        | 325(4.63)                                                    | —       |
| Hypertension      |              |                                                             |                                                                   |                                                                  |                                                              | <0.01   |
| No                | 9021(32.15)  | 2457(35.02)                                                 | 2198(31.32)                                                       | 2236(31.89)                                                      | 2130(30.38)                                                  | —       |
| Yes               | 19029(67.83) | 4558(64.98)                                                 | 4820(68.68)                                                       | 4769(68.02)                                                      | 4882(69.62)                                                  | —       |
| Missing           | 6(0.02)      | 0(0.00)                                                     | 0(0.00)                                                           | 6(0.09)                                                          | 0(0.00)                                                      | —       |
| Diabetes Mellitus |              |                                                             |                                                                   |                                                                  |                                                              | <0.01   |
| No                | 20847(74.3)  | 4692(66.89)                                                 | 5523(78.7)                                                        | 5234(74.65)                                                      | 5398(76.98)                                                  | —       |
| Yes               | 5272(18.79)  | 1163(16.58)                                                 | 1331(18.97)                                                       | 1359(19.38)                                                      | 1419(20.24)                                                  | —       |

|             |              |             |             |             |             |       |
|-------------|--------------|-------------|-------------|-------------|-------------|-------|
| Missing     | 1937(6.9)    | 1160(16.54) | 164(2.34)   | 418(5.96)   | 195(2.78)   | —     |
| Smoke       |              |             |             |             |             | <0.01 |
| No          | 18217(64.93) | 4083(58.2)  | 4749(67.67) | 4759(67.88) | 4626(65.97) | —     |
| Yes         | 7133(25.42)  | 1732(24.69) | 1888(26.9)  | 1667(23.78) | 1846(26.33) | —     |
| Missing     | 2706(9.64)   | 1200(17.11) | 381(5.43)   | 585(8.34)   | 540(7.7)    | —     |
| Drink       |              |             |             |             |             | <0.01 |
| No          | 23133(82.45) | 5854(83.45) | 5795(82.57) | 5816(82.96) | 5668(80.83) | —     |
| Yes         | 4910(17.5)   | 1156(16.48) | 1223(17.43) | 1188(16.94) | 1343(19.15) | —     |
| Missing     | 13(0.05)     | 5(0.07)     | 0(0.00)     | 7(0.1)      | 1(0.01)     | —     |
| Sport       |              |             |             |             |             | <0.01 |
| No          | 11147(39.73) | 2845(40.56) | 2670(38.05) | 2788(39.77) | 2844(40.56) | —     |
| Yes         | 16901(60.24) | 4168(59.42) | 4348(61.95) | 4217(60.15) | 4168(59.44) | —     |
| Missing     | 8(0.03)      | 2(0.03)     | 0(0.00)     | 6(0.09)     | 0(0.00)     | —     |
| Milk        |              |             |             |             |             | <0.01 |
| No          | 17073(60.85) | 3604(51.38) | 4330(61.7)  | 4288(61.16) | 4851(69.18) | —     |
| Yes         | 4449(15.86)  | 1153(16.44) | 1094(15.59) | 1164(16.6)  | 1038(14.8)  | —     |
| Missing     | 6534(23.29)  | 2258(32.19) | 1594(22.71) | 1559(22.24) | 1123(16.02) | —     |
| BMI         |              |             |             |             |             | <0.01 |
| (-Inf,18.5] | 545(1.94)    | 150(2.14)   | 150(2.14)   | 151(2.15)   | 94(1.34)    | —     |
| (18.5,24]   | 10580(37.71) | 2964(42.25) | 2748(39.16) | 2591(36.96) | 2277(32.47) | —     |
| (24,28]     | 11849(42.23) | 2875(40.98) | 2916(41.55) | 2997(42.75) | 3061(43.65) | —     |
| (28, Inf]   | 5055(18.02)  | 1008(14.37) | 1203(17.14) | 1270(18.11) | 1574(22.45) | —     |
| Missing     | 18(0.26)     | 1(0.01)     | 2(0.03)     | 6(0.09)     | 0(0.00)     | —     |

■ Central 
 ■ North 
 ■ Northwest 
 ■ Southwest  
■ East 
 ■ Northeast 
 ■ South

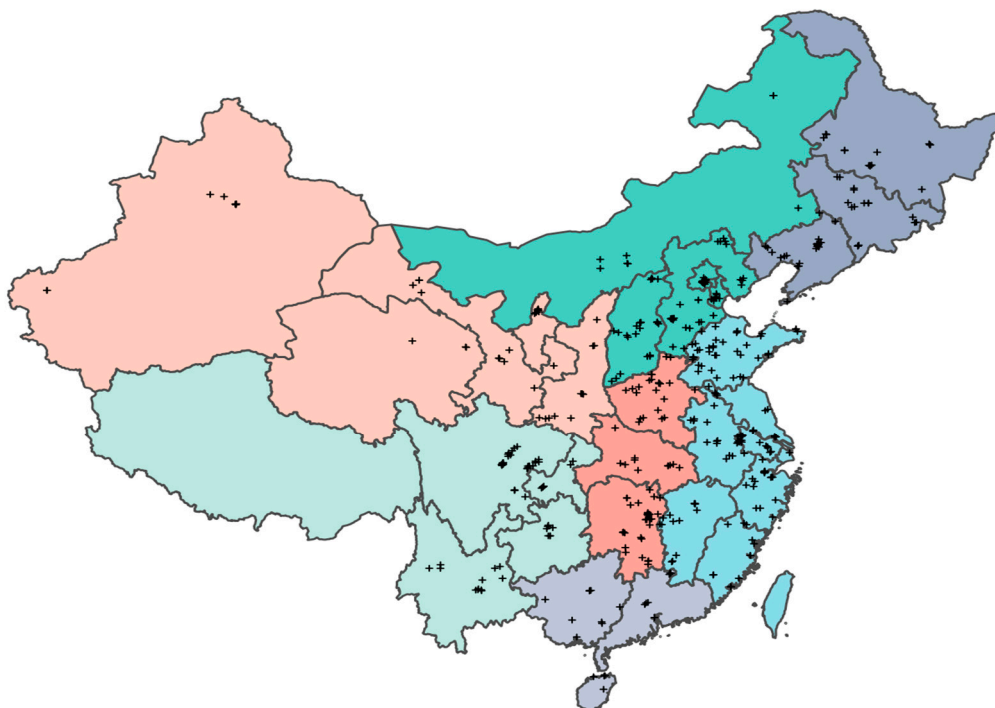

Supplementary Figure S1. Locations of surveyed counties of CNSSS from 2014 to 2019. (+) represents the locations of the surveyed counties.

**a**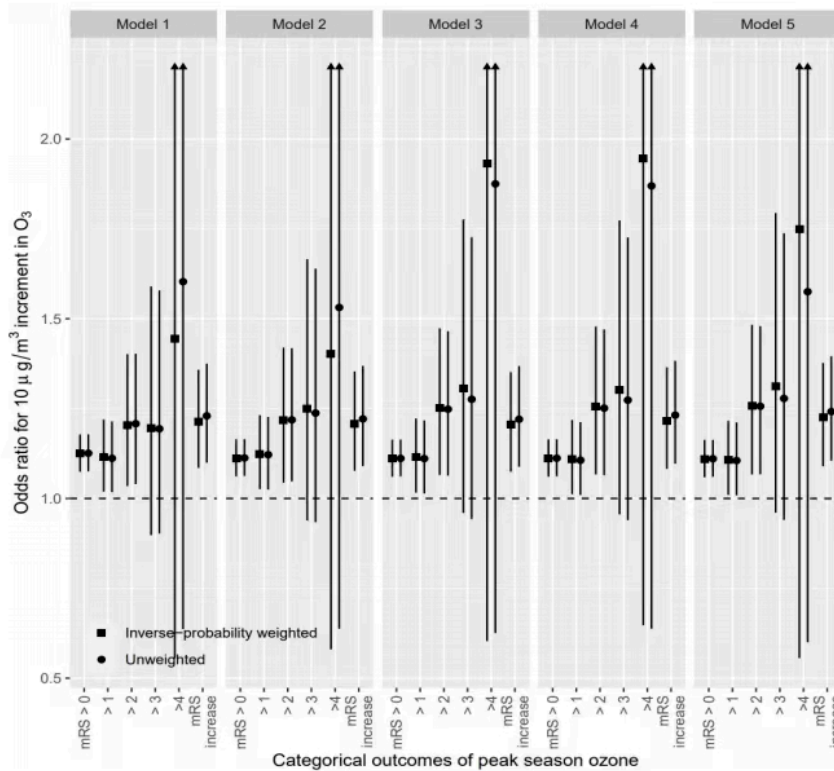**b**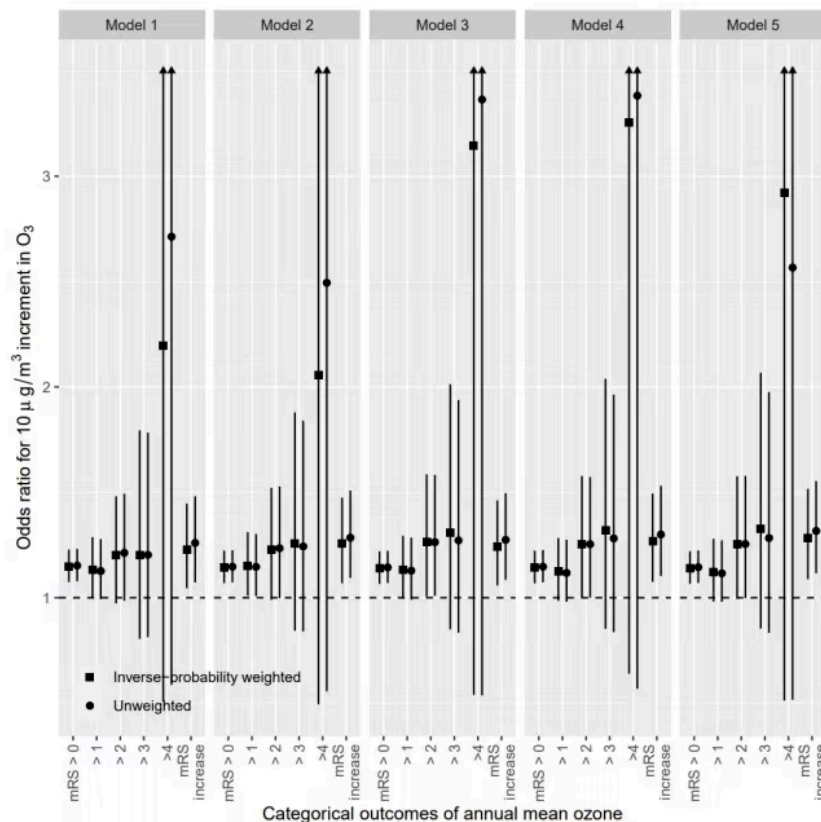

Supplemental Figure S2. Associations of  $\text{O}_3$  exposure with different categorical mRS score outcomes for per 10  $\mu\text{g}/\text{m}^3$  increment of  $\text{O}_3$ . a: Peak season  $\text{O}_3$ . b: Annual mean  $\text{O}_3$ . Model 1 was only adjusted for the interaction of follow-up period with age at baseline, and the interaction of follow-up period with years after stroke at baseline. Model 2 was additionally adjusted for season. Model 3 was additionally adjusted for smoking, drinking, physical activity, milk intake, and body mass index. Model 4 was additionally adjusted for  $\text{PM}_{2.5}$ .

Model 5 was additionally adjusted for hypertension, diabetes, dyslipidemia and atrial fibrillation. mRS, modified Rankin Scale.
